# Supplementary material for: N-Terminal Sequences of Signal Peptides Assuming Critical Roles in Expression of Heterologous Proteins in <em>Bacillus subtilis</em>
Source: Preprints.org preprint supplement (doi:10.20944/preprints202404.1992.v1), 2024-04-30
Supplement: Supplementary file 1 [file supplementary]

N-terminal sequences of signal peptides assuming critical roles in expression of heterologous proteins in *Bacillus subtilis*

Meijuan Zhang1,†,Jie Zhen2,3,4,†,*, Jia Teng2,6, Xingya Zhao2,3, Xiaoping Fu2,3, Hui Song2,3,4, Yeni Zhang6, Hongchen Zheng2,3,4,5,*, and Wenqin Bai2,3,4,5,*

1 College of Life Science and Agriculture Forestry, Qiqihar University, Qiqihar 161006, China; [zhangmei-juan_002@163.com](mailto:zhangmei-juan_002@163.com)

2 Industrial Enzymes National Engineering Research Center, Tianjin Institute of Industrial Biotechnology, Chi-nese Academy of Sciences, Tianjin 300308, China; zheng_hc@tib.cas.cn

3 National Center of Technology Innovation for Synthetic Biology, Tianjin 300308, China; zheng_hc@tib.cas.cn

4 Tianjin Key Laboratory for Industrial Biological Systems and Bioprocessing Engineering, Tianjin Institute of Industrial Biotechnology, Chinese Academy of Sciences, Tianjin 300308, China; zheng_hc@tib.cas.cn

5 Key Laboratory of Engineering Biology for Low-carbon Manufacturing, Tianjin Institute of Industrial Bio-tech-nology, Chinese Academy of Sciences, Tianjin 300308, China; Baiwq@tib.cas.cn

6 College of Food Science and Biotechnology, Tianjin Agricultural University, Tianjin 300392, China; zhang-yeni@tjau.edu.cn

† These authors contributed equally to this work and share first authorship.

* Correspondence: zheng_hc@tib.cas.cn (H.Z), Baiwq@tib.cas.cn (W.B), and zhen_j@tib.cas.cn (J.Z); Tel.: +86-022-84861933

| Primers | Sequence (5’-3’) |
| --- | --- |
| APL-F | CGCCATATGGAATTCATGGCGGGCAATGCAGATTAC |
| APL-R | CTAGCTAGCTTAATAGCTCGTCTTCAGCCAGTTGTC |
| LipA-F | CGCCATATGATGAAATTTGTGAAACGCAGAATTATTG |
| LipA(YncM N5)-F | CGCCATATGATGGCTAAACCGCTGCGCAGAATTATTGCGCTGGTG |
| LipA(YncM N7)-F | CGCCATATGATGGCTAAACCGCTGTCAAAAATTATTGCGCTGGTGACAATTCTG |
| LipA-R | CCGGAATTCCGCTTTCGCGCTCGGTTG |
| YncM-F | CGCCATATGATGGCTAAACCGCTGTCAAAAG |
| YncM(LipA N5)-F | CGCCATATGATGAAATTTGTGAAATCAAAAGGCGGCATTCTGG |
| YncM(LipA N7)-F | CGCCATATGATGAAATTTGTGAAACGCAGAGGCGGCATTCTGGTTAAAAAAG |
| YncM-R | CCGGAATTCCGCATCAGCTGCTGGCAG |
| WapA-F | CGCCATATGATGAAAAAACGCAAACGCAG |
| WapA-R | CCGGAATTCCGCCAGCACATCCGCCG |
| PelB-F | CGCCATATGATGAAATACCTGCTGCCGAC |
| PelB-R | CCGGAATTCGGCCATCGCCGGCTGGG |
| AmyX-F | CGCCATATGATGGTCAGCATCCGCCG |
| AmyX(LipA N5)-F | CGCCATATGATGAAATTTGTGAAACGCAGCTTCGAAGCGTATG |
| AmyX(LipA N7)-F | CGCCATATGATGAAATTTGTGAAACGCAGATTCGAAGCGTATGTCGATGAC |
| AmyX-R | CCGGAATTCCGGCGGTGTCATGATTTC |
| APL(LipA N5)-F | CGCCATATGATGAAATTTGTGAAAGATTACAATCTGACCGGCTTC |
| pMA5-test-F | CTTTGCTGAGGTGGCAGAGGGC |
| pMA5-test-R | GCTTGCTTTCGAGGTGAATTAGCTTG |
| APL-qPCR-F | ATTCGGGATTACCAGCAACGGG |
| APL-qPCR-R | ATCCGTCTGATTGTTGCGCACC |
| danN-qPCR-F | GCACTTGCCGCAGATTGA |
| danN-qPCR-R | AATGCAAGACGGTGGCTATC |

Table S1. Primers used in this study.
